# Supplementary material for: Acidity modifications of nanozeolite-Y for enhanced selectivity to olefins from the steam catalytic cracking of dodecane
Source: Royal Society of Chemistry journal article supplement (doi:10.1039/d2ra02184f), 2022-01-01
Supplement: d2ra02184f1.pdf [file d2ra02184f1.pdf]

### List of Supplementary Information

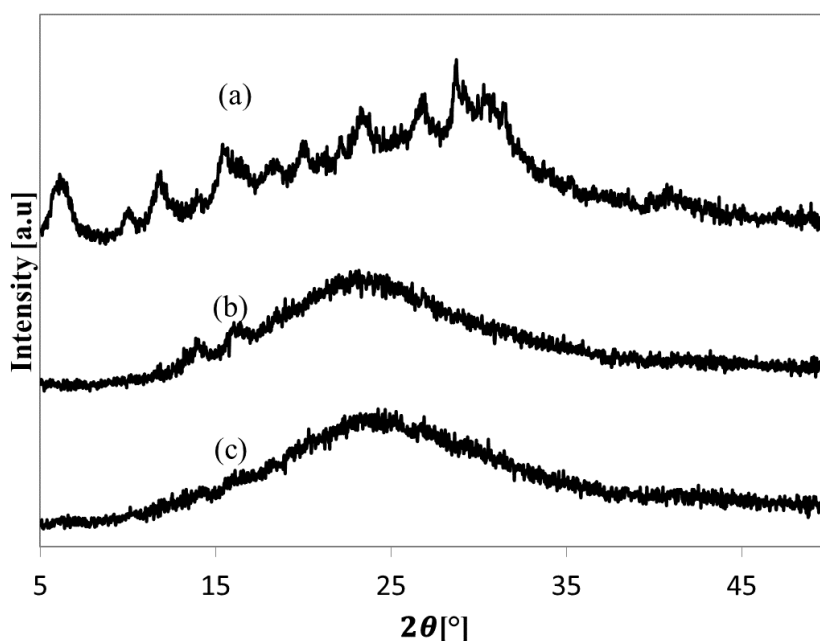

Figure S1. XRD patterns of nanozeolite (a) NH<sub>4</sub>-Y10 (b) SY-10 (c) HY-10

#### (a) H-Y10

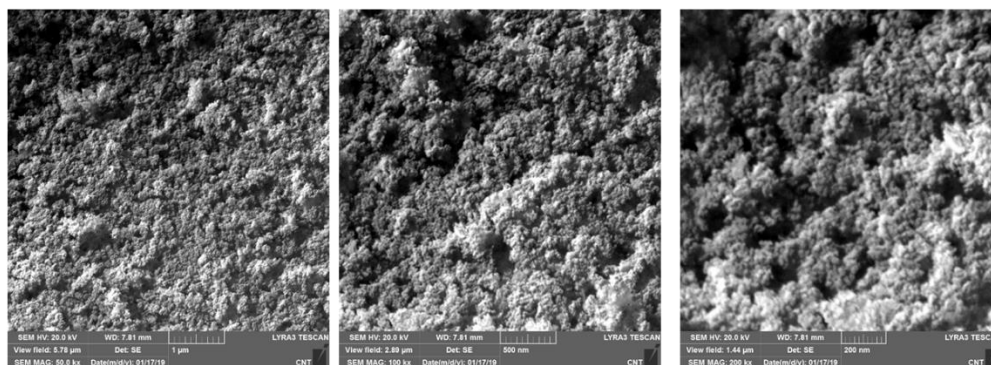

#### (b) SY-10

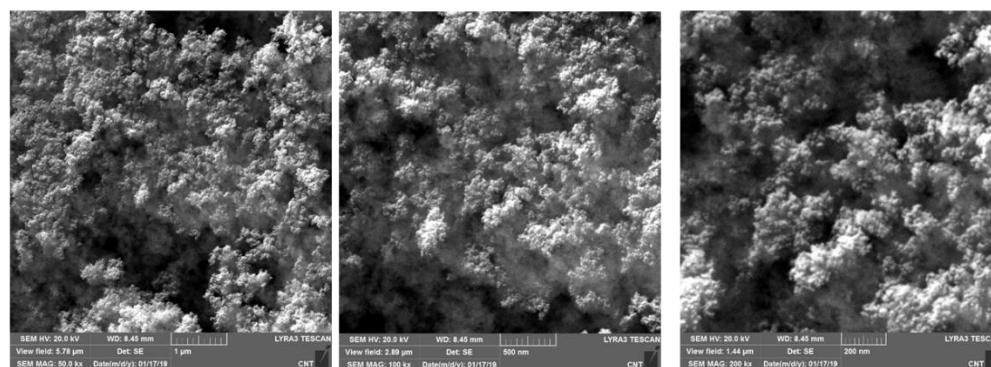

Figure S2. SEM analysis of nanozeolite (a) H-Y10 and (b) SY-10

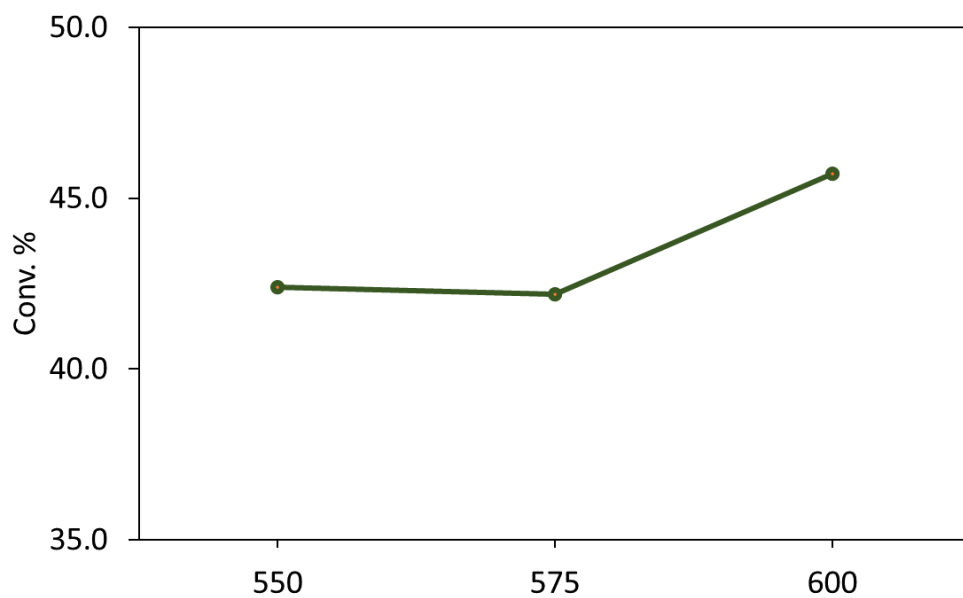

Figure S3. Uncatalyzed reactions of dodecane conversions

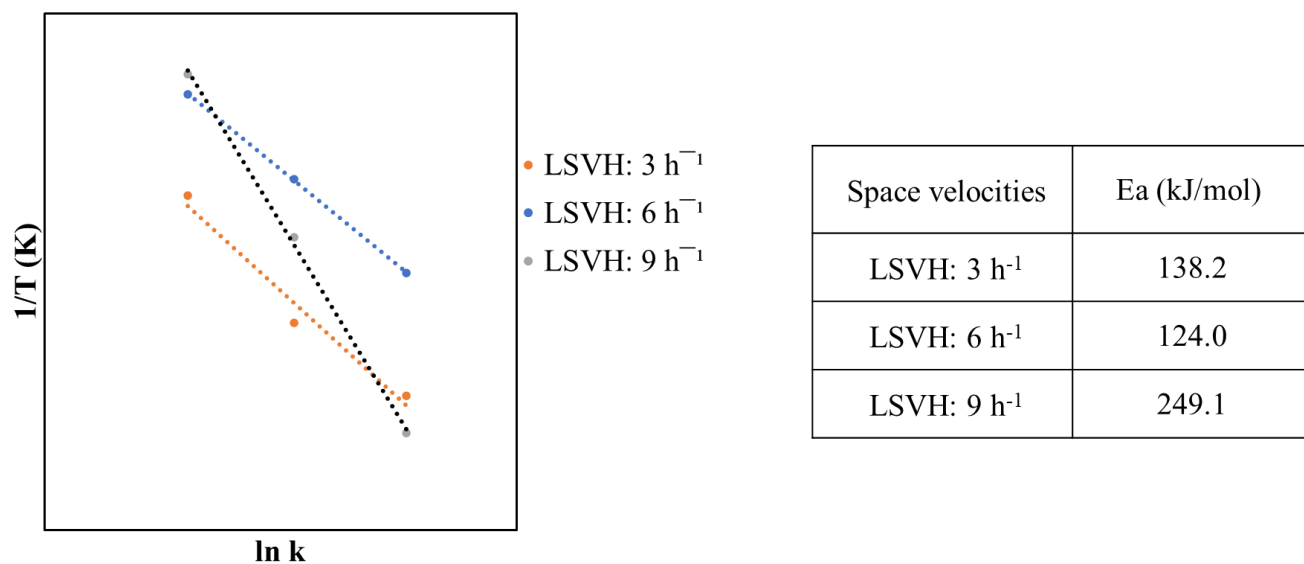

Figure S4. Kinetics and activation energy of the studied reactions

Table S1

| Catalyst              | Condition                               | Conversion (%) | Olefin selectivity (%) | Ref        |
|-----------------------|-----------------------------------------|----------------|------------------------|------------|
| B-MFI (Modifier: NaF) | T: 350 °C, 1 h, 10% water, 90% dodecane | 3              | 43                     | 1          |
| BEA <sub>deSil</sub>  | T: 350 °C, 1 h, 10% water, 90% dodecane | 30             | 7                      | 2          |
| ZSM-Li                | T: 550 °C; P: 4 MPa                     | 61             | 31                     | 3          |
| 10%Zr-Ti oxide        | T: 625 °C; 10% water, 90% dodecane      | 80             | 28                     | 4          |
| DZN-4                 | T: 550 °C; P: 4 MPa                     | 60             | 4                      | 5          |
| S-Y10                 | T: 550 °C, 1 h, 10% water, 90% dodecane | 50             | 50                     | This study |

### References

1. M. A. Sanhoob, O. Muraza, E. N. Shafei, T. Yokoi and K.-H. Choi, *Applied Catalysis B: Environmental*, 2017, **210**, 432-443.
2. M. A. Sanhoob, U. Khalil, E. N. Shafei, K.-H. Choi, T. Yokoi and O. Muraza, *Fuel*, 2020, **263**, 116624.
3. Y. Ji, H. Yang and W. Yan, *Fuel*, 2019, **243**, 155-161.
4. E. N. Shafei, M. Z. Albahar, M. F. Aljishi, A. N. Aljishi, A. S. Alnasir, H. H. Al-Badairy and M. A. Sanhoob, *Reaction Chemistry & Engineering*, 2022, **7**, 123-132.
5. Y. Tian, B. Zhang, S. Gong, L. Wang, X. Zhang, C. Qiao and G. Liu, *Microporous and Mesoporous Materials*, 2021, **310**, 110598.
